# Supplementary material for: Soil pH, Calcium Content and Bacteria as Major Factors Responsible for the Distribution of the Known Fraction of the DNA Bacteriophage Populations in Soils of Luxembourg
Source: MDPI journal article supplement (doi:10.3390/microorganisms10071458), 2022-07-19
Supplement: s1 [file s1]

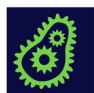

**Supplementary Table S2:** Shannon diversity index (H), evenness (E) and species richness (S) of bacteria populations in the soil of the studied sites

| Sites         | Shannon Index (H) | Evenness (E) | Species Richness (S) |
|---------------|-------------------|--------------|----------------------|
| Daerent       | 3.12              | 0.320        | 17,016               |
| Hueschterbach | 3.11              | 0.320        | 16,799               |
| Koulbich      | 3.13              | 0.317        | 19,063               |
| Mollbach      | 3.11              | 0.317        | 18,165               |
| Pall 1        | 3.18              | 0.325        | 17,381               |
| Pall 2        | 3.13              | 0.320        | 17,943               |
| Retgenbusch   | 2.78              | 0.290        | 15,247               |
| Weierbach     | 2.89              | 0.30         | 15,272               |
