# Supplementary material for: Soil pH, Calcium Content and Bacteria as Major Factors Responsible for the Distribution of the Known Fraction of the DNA Bacteriophage Populations in Soils of Luxembourg
Source: MDPI journal article supplement (doi:10.3390/microorganisms10071458), 2022-07-19
Supplement: s1 [file s1]

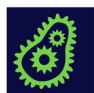

**Supplementary Table S1:** Percentages of relative abundances identified for each taxonomic domain

| Sites         | Bacteria | Eukaryota | Archaea | Viruses | Unclassified |
|---------------|----------|-----------|---------|---------|--------------|
| Daerent       | 74.49%   | 0.30%     | 0.21%   | 0.030%  | 24.97%       |
| Weierbach     | 75.51%   | 0.32%     | 0.33%   | 0.011%  | 23.37%       |
| Retgenbusch   | 75.51%   | 0.48%     | 0.13%   | 0.016%  | 23.85%       |
| Mollbach      | 75.04%   | 0.39%     | 0.11%   | 0.020%  | 24.43%       |
| Koulbich      | 75.21%   | 0.43%     | 0.22%   | 0.014%  | 24.12%       |
| Hueschterbach | 76.36%   | 0.22%     | 0.21%   | 0.020%  | 23.19%       |
| Pall1         | 76.16%   | 0.17%     | 0.20%   | 0.025%  | 23.44%       |
| Pall 2        | 75.00%   | 0.35%     | 0.18%   | 0.020%  | 24.45%       |
