# Supplementary material for: Soil pH, Calcium Content and Bacteria as Major Factors Responsible for the Distribution of the Known Fraction of the DNA Bacteriophage Populations in Soils of Luxembourg
Source: MDPI journal article supplement (doi:10.3390/microorganisms10071458), 2022-07-19
Supplement: s1 [file s1]

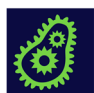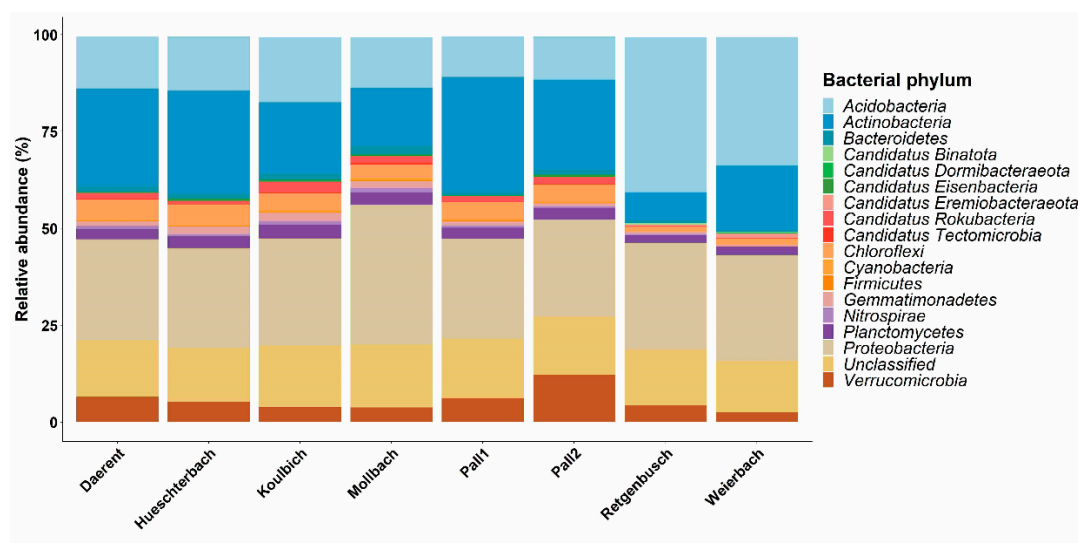

**Supplementary Figure S1:** Bar charts of the relative abundance (in %) of bacterial phylum (selected genera with an abundance above 100 occurrences) from the known fraction of all studied sites.
