# Supplementary material for: Soil pH, Calcium Content and Bacteria as Major Factors Responsible for the Distribution of the Known Fraction of the DNA Bacteriophage Populations in Soils of Luxembourg
Source: Microorganisms. 2022 Jul 19;10(7):1458. doi: 10.3390/microorganisms10071458 (PMC9321959; doi:10.3390/microorganisms10071458)
Supplement: Supplementary file 1 [file microorganisms-10-01458-s001.zip]

Archive with 4 entries (4 files):
- Supplementary_FigureS1.pdf
- Supplementary_material_v1.pdf
- Supplementary_TableS1_v1.pdf
- Supplementary_TableS2_v1.pdf
